# Supplementary material for: Overexpression of NOX2 Exacerbates AngII-Mediated Cardiac Dysfunction and Metabolic Remodelling
Source: MDPI journal article supplement (doi:10.3390/antiox11010143), 2022-01-10
Supplement: s1 [file s1]

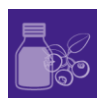

## Supplemented data

**Preparation of homogenate:** Frozen heart tissue was toughed in ice-cold A1 buffer (250 mM Sucrose, 0.5 mM Na<sub>2</sub>EDTA, 10 mM Tris, pH 7.4). The following steps were performed on ice. Approximately 20 mg tissue in 0.5 mL A1 buffer was cut into 1x1 mm pieces. After 10 min incubation at 4°C with 0.5 mg/mL trypsin (Sigma Aldrich), the buffer was removed, and the sample was washed twice with 2 mL A1. Thereafter, the tissue was transferred to a shredder tube (Oroboros Instrument, Innsbruck, Austria) containing 0.5 mL Mir05 (0.5 mM EGTA, 3 mM MgCl<sub>2</sub>·6H<sub>2</sub>O, 20 mM Taurine, 10 mM KH<sub>2</sub>PO<sub>4</sub>, 20 mM HEPES, 110 mM Sucrose, 50 mM K-lactobionate, 1 g/L BSA, pH 7.1). Tissue homogenate was made by placing the shredder tube in a shredder holder (Oroboros Instrument) and homogenize for 12 sec. at position 1 by using the PBI-Shredder SG3 (Oroboros Instrument). The homogenate was collected and centrifuged (Heraeus Biofuge, Thermo Scientific) at appr. 60 x g in 1 min. Finally, the supernatant was transferred to an Eppendorf tube and stored on ice until respiration analysis.

**Table S1.** mRNA expression of genes in cardiac tissue from C57BL/6J mice treated with 50ng/kg/min AngII (AngII<sub>50</sub>) or saline (sham) for two weeks.

|             | Sham      | AngII <sub>50</sub> |
|-------------|-----------|---------------------|
| <i>n</i>    | 7         | 10                  |
| <i>iNOS</i> | 1 ± 0.15  | 0,7 ± 0.08          |
| <i>ucp3</i> | 1 ± 0.11  | 1.1 ± 0.17          |
| <i>nppb</i> | 1.0 ± 0.1 | 1.2 ± 0.2           |
| <i>nppa</i> | 1.0 ± 0.1 | 1.3 ± 0.2           |

Data are means ± SEM. *nppb*, natriuretic peptide b; *nppa*, natriuretic peptide A; iNOS, inducible nitric oxide synthase; *ucp3*, uncoupling protein 3. mRNA expression of the genes of interest was adjusted to the housekeeping gene hypoxanthine guanine phosphoribosyl transferase *hppt*.

**Table S2.** mRNA expression of genes in cardiac tissue from C57BL/6J mice treated with 400 ng/kg/min AngII (AngII<sub>400</sub>) or saline (sham) for two weeks.

|              | Sham        | AngII <sub>400</sub>     |
|--------------|-------------|--------------------------|
| <i>n</i>     | 9-10        | 9-10                     |
| <i>ppara</i> | 1.00 ± 0.12 | 0.97 ± 0.05              |
| <i>cd36</i>  | 1.00 ± 0.06 | 0.96 ± 0.03              |
| <i>pdh4</i>  | 1.00 ± 0.13 | 0.73 ± 0.08              |
| <i>ldh</i>   | 1.00 ± 0.04 | 0.87 ± 0.03 <sup>#</sup> |
| <i>hk</i>    | 1.00 ± 0.03 | 0.96 ± 0.05              |
| <i>nox2</i>  | 1.00 ± 0.09 | 1.10 ± 0.11              |

Data are means ± SEM. *ppara*, peroxisome proliferator-activated receptor  $\alpha$ ; *cd36*, cluster of differentiation 36; *pdh4*, pyruvate dehydrogenase kinase 4; *ldh*, lactate dehydrogenase; *hk*, hexokinase; *nox2*, nicotinamide-adenine dinucleotide phosphate oxidase 2. <sup>#</sup> p < 0.05 compared to sham. mRNA expression of the genes of interest was adjusted to the housekeeping gene hypoxanthine guanine phosphoribosyl transferase *hppt*

**Table S3.** mRNA expression of genes in cardiac tissue from male (WT) and cs NOX2 transgenic (TG) mice treated with 400 ng/kg/min AngII (AngII<sub>400</sub>) for two weeks.

|              | WT AngII <sub>400</sub> | TG AngII <sub>400</sub>   |
|--------------|-------------------------|---------------------------|
| <i>n</i>     | 4-6                     | 5-6                       |
| <i>nppb</i>  | 1.00 ± 0.11             | 0.86 ± 0.10               |
| <i>nppa</i>  | 1.00 ± 0.20             | 0.72 ± 0.22               |
| <i>ppara</i> | 1.00 ± 0.05             | 0.97 ± 0.03               |
| <i>cd36</i>  | 1.00 ± 0.04             | 0.98 ± 0.02               |
| <i>pd4</i>   | 1.00 ± 0.07             | 1.57 ± 0.13 <sup>#</sup>  |
| <i>ldh</i>   | 1.00 ± 0.05             | 0.93 ± 0.04               |
| <i>hk</i>    | 1.00 ± 0.02             | 1.00 ± 0.02               |
| <i>nox2</i>  | 1.00 ± 0.06             | 33.51 ± 1.08 <sup>#</sup> |

Data are means ± SEM. *nppb*, natriuretic peptide b; *nppa*, natriuretic peptide A; *ppara*, peroxisome proliferator-activated receptor  $\alpha$ ; *cd36*, cluster of differentiation 36; *pd4*, pyruvate dehydrogenase kinase 4; *ldh*, lactate dehydrogenase; *hk*, hexokinase; *nox2*, nicotinamide-adenine dinucleotide phosphate oxidase 2. mRNA expression of the genes of interest was adjusted to the housekeeping gene hypoxanthine guanine phosphoribosyl transferase *hppt*. #  $p < 0.05$  vs WT.

**Table S4.**

mRNA expression of the genes of interest was adjusted to the housekeeping gene hypoxanthine guanine phosphoribosyl transferase *hppt*.

|              | Gene Forward                        | Gene Accession Number | Reverse                         |
|--------------|-------------------------------------|-----------------------|---------------------------------|
| <i>iNOS</i>  | CAG-CTG-GGC-TGT-ACA                 | NM_010927.4           | CAT-TGG-AAG-TGA-AGC-GTT         |
| <i>ucp3</i>  | TAC-CCA-ACC-TTG-GCT-AGA             | NM_009464.3           | GCC-TGG-CAA-TCT-TTT-GCT-T       |
| <i>nppb</i>  | CCA GTC TCC AGA GCA ATT CAA         | NM_008726.5           | GCC ATT TCC TCC GAC TTT T       |
| <i>nppa</i>  | CAC AGA TCT GAT GGA TTT CAA GA      | NM_008725.3           | CCT CAT CTT CTA CCG GCA TC      |
| <i>ppara</i> | ACG ATG CTG TCC TCC TTG ATG         | NM_0111446            | GTG TGA TAA AGC CAT TGC CGT     |
| <i>cd36</i>  | TTG TAC CTA TAC TGT GGC TAA ATG AGA | NM_001159558.1        | CTT GTG TTT TGA ACA TTT CTG CTT |
| <i>pd4</i>   | TTC ACA CCT TCA CCA CAT GC          | NM_013743.2           | AAA GGG CGG TTT TCT TGA TG      |
| <i>ldh</i>   | CAT TGT CAA GTA CAG TCC ACA CT      | NM_010699.2           | TTC CAA TTA CTC GGT TTT TGG GA  |
| <i>hk</i>    | GAA GGG GCT AGG AGC TAC CA          | NM_013820.3           | CTC GGA GCA CAC GGA AGT T       |
| <i>nox2</i>  | TGAATGCCAGAGTCGGGATTT               | NM_007807.5           | CCCCCTCAGGGTTCTTGATT            |
| <i>hppt</i>  | TCC TCC TCA GAC CGC TTT T           | NM_013556.2           | CCT GGT TCA TCA TCG CTA ATC     |

Inducible nitric oxide synthase (*iNOS*); uncoupling protein 3 (*ucp3*); natriuretic peptide B (*nppb*); natriuretic peptide A (*nppa*); peroxisome proliferator-activated receptor  $\alpha$  (*ppara*); cluster of differentiation 36 (*cd36*); pyruvate dehydrogenase kinase 4 (*pd4*); lactate dehydrogenase (*ldh*); hexokinase (*hk*); nicotinamide-adenine dinucleotide phosphate oxidase 2 (*nox2*); hypoxanthine guanine phosphoribosyl transferase *hppt*.

**Table S5.** *Ex vivo* steady-state measurements of cardiac function from C57Bl/6J, WT and csNOX2 transgenic (TG) mice treated for two weeks with micro-osmotic pumps containing either Saline (sham), 50 or 400ng/kg/min Angiotensin II (AngII<sub>50</sub> and AngII<sub>400</sub>). The data are presented as mean  $\pm$  SEM.

|                                  | Sham           | AngII <sub>50</sub> | Sham           | AngII <sub>400</sub> | WT AngII <sub>400</sub> | TG AngII <sub>400</sub> |
|----------------------------------|----------------|---------------------|----------------|----------------------|-------------------------|-------------------------|
|                                  | <i>n</i> = 9   | <i>n</i> = 11       | <i>n</i> = 6   | <i>n</i> = 9         | <i>n</i> = 5            | <i>n</i> = 6            |
| BPM                              | 389 $\pm$ 12   | 384 $\pm$ 10        | 349 $\pm$ 17   | 361 $\pm$ 13         | 361 $\pm$ 17            | 324 $\pm$ 16            |
| CO (mL/min)                      | 13.5 $\pm$ 0.7 | 12.2 $\pm$ 0.6      | 13 $\pm$ 1     | 13 $\pm$ 1           | 13.0 $\pm$ 0.9          | 13.4 $\pm$ 0.6          |
| CF (mL/min)                      | 2.8 $\pm$ 0.2  | 3.5 $\pm$ 0.2       | 3.4 $\pm$ 0.3  | 3.2 $\pm$ 0.2        | 4.0 $\pm$ 0.5           | 3.8 $\pm$ 0.3           |
| DEVP (mmHg)                      | 37 $\pm$ 2     | 37 $\pm$ 3          | 42 $\pm$ 3     | 41 $\pm$ 3           | 45 $\pm$ 3              | 52 $\pm$ 3              |
| dp/dt <sub>max</sub><br>(mmHg/s) | 1641 $\pm$ 85  | 1615 $\pm$ 106      | 1611 $\pm$ 110 | 1663 $\pm$ 84        | 1940 $\pm$ 48           | 1888 $\pm$ 62           |
| dp/dt <sub>min</sub><br>(mmHg/s) | -844 $\pm$ 93  | -950 $\pm$ 150      | -821 $\pm$ 114 | -718 $\pm$ 146       | -1024 $\pm$ 96          | -1008 $\pm$ 86          |

BPM beats per minute; CO, Cardiac Output; CF, Coronary Flow; DEVP, Aortic developed pressure; dp/dt<sub>max</sub> and dp/dt<sub>min</sub>, maximal and minimal first derivative of pressure over time, respectively.
